# Supplementary material for: Heterologous Expression of the Thiopeptide Antibiotic GE2270 from Planobispora rosea ATCC 53733 in Streptomyces coelicolor Requires Deletion of Ribosomal Genes from the Expression Construct
Source: PubMed Central journal article supplement (PMC3943966; doi:10.1371/journal.pone.0090499), 2014-03-05
Supplement: pone.0090499.s001.pdf [file pone.0090499.s001.pdf]

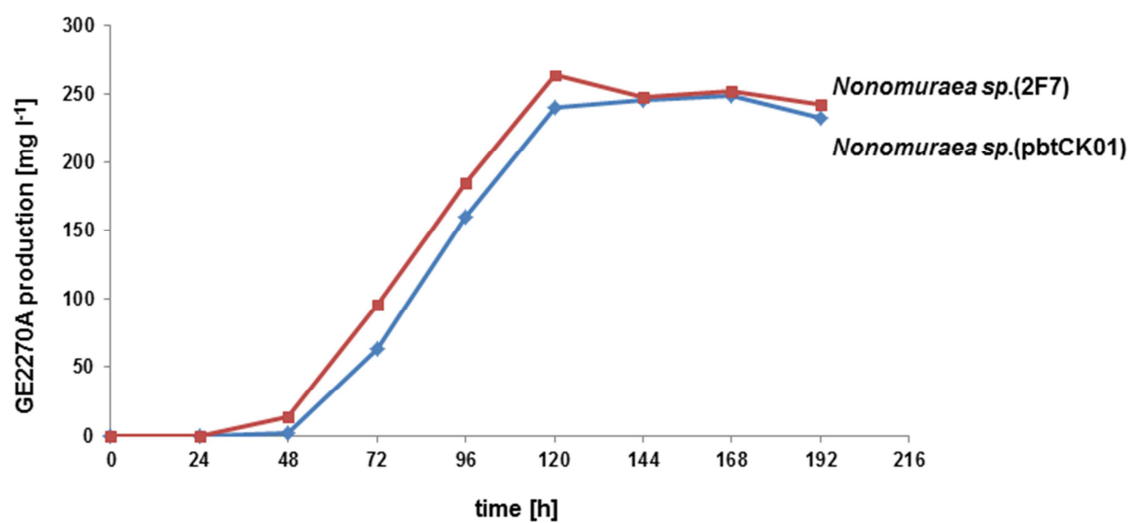

Figure S1. Comparison of the original cosmid 2F7 and pbtCK01 lacking 22 ribosomal genes concerning GE2270A production over time in *Nonomuraea* sp. ATCC39727.
